# Supplementary material
Source: Springer Nature journal article supplement (https://www.springermedizin.de/resource/supplementary/12891_2008_481_MOESM2_ESM.pdf/9511532)

## Quorum flow chart of the reviewing process

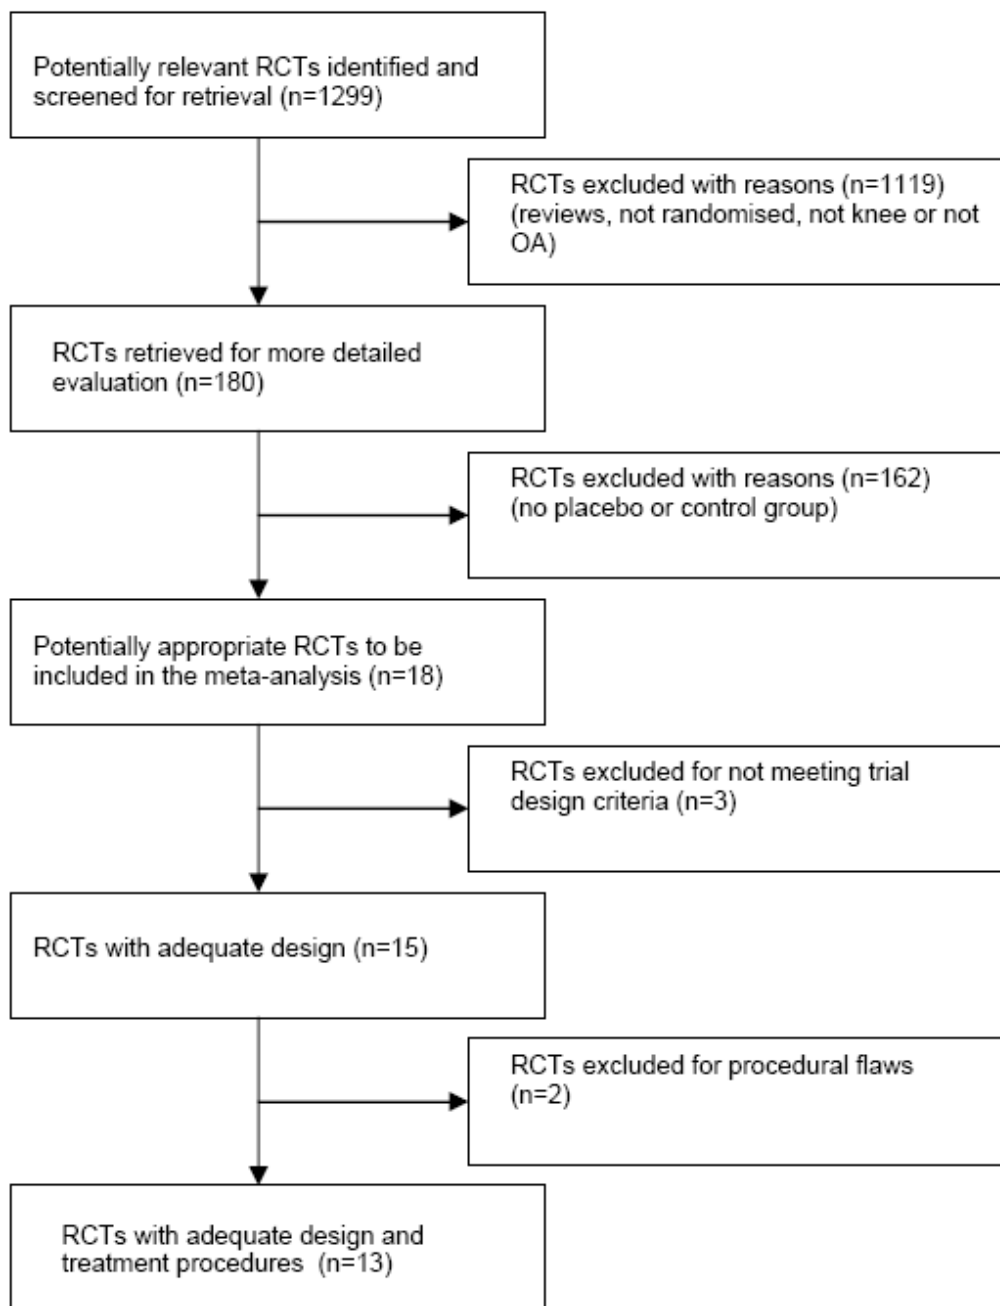

Supplement: MOESM2 [file 9511532]
